# Supplementary material for: A small predatory core genome in the divergent marine Bacteriovorax marinus SJ and the terrestrial Bdellovibrio bacteriovorus
Source: PubMed Central journal article supplement — ISME J. 2012 Sep 6;7(1):148–60. doi: 10.1038/ismej.2012.90 (PMC3526173; doi:10.1038/ismej.2012.90), 2012-09-06
Supplement: ismej201290x4.pdf [file ismej201290x4.pdf]

Supplementary Table 1. Characteristics of the *B. marinus* Regions of difference (BMRD) by locus tag identifier and assigned product

BMRD1.

|         |       |                                                 |
|---------|-------|-------------------------------------------------|
| BMS0031 | 4.1.1 | putative integral membrane protein              |
| BMS0032 | 4.1.1 | putative integral membrane protein              |
| BMS0033 | 4.1.1 | putative integral membrane protein              |
| BMS0034 | 4.1.1 | putative integral membrane protein              |
| BMS0035 | 4.1.1 | putative integral membrane protein              |
| BMS0036 | 4.1.1 | putative integral membrane protein              |
| BMS0037 | 4.1.1 | putative integral membrane protein              |
| BMS0038 | 7.0.0 | tetratricopeptide repeat family protein         |
| BMS0039 | 0.0.0 | hypothetical protein                            |
| BMS0040 | 6.2.1 | putative RNA polymerase ECF-type sigma factor   |
| BMS0041 | 4.1.0 | putative secreted protein                       |
| BMS0042 | 3.1.3 | asparagine synthetase B [glutamine-hydrolyzing] |
| BMS0043 | 6.3.1 | AsnC-family transcriptional regulator           |
| BMS0044 | 6.1.2 | putative two-component response regulator       |
| BMS0045 | 4.1.1 | putative integral membrane protein              |

BMRD2.

|         |        |                                                                           |
|---------|--------|---------------------------------------------------------------------------|
| BMS0069 | 1.7.1  | cell division protein                                                     |
| BMS0070 | 0.0.0  | hypothetical protein                                                      |
| BMS0071 | 0.0.0  | hypothetical protein                                                      |
| BMS0072 | 7.0.0  | putative beta-lactamase family protein                                    |
| BMS0073 | 3.3.17 | uridine kinase                                                            |
| BMS0075 | 1.5.0  | putative periplasmic substrate-binding transport protein                  |
| BMS0076 | 4.2.2  | putative ribosomal protein L11 methyltransferase                          |
| BMS0077 | 0.0.2  | conserved hypothetical protein                                            |
| BMS0078 | 4.1.1  | putative RDD domain containing membrane protein                           |
| BMS0079 | 7.0.0  | putative cytidyltransferase                                               |
| BMS0080 | 0.0.0  | hypothetical protein                                                      |
| BMS0081 | 1.1.1  | putative flagellin FliC                                                   |
| BMS0082 | 1.1.1  | -                                                                         |
| BMS0083 | 0.0.0  | hypothetical protein                                                      |
| BMS0084 | 7.0.0  | putative metallophosphoesterase                                           |
| BMS0085 | 2.2.3  | putative DNA repair protein                                               |
| BMS0086 | 3.3.0  | putative inorganic polyphosphate/ATP-NAD kinase (Poly (P)/ATP NAD kinase) |
| BMS0087 | 6.1.2  | putative two-component response regulator                                 |
| BMS0088 | 6.1.1  | putative two-component sensor kinase                                      |
| BMS0089 | 0.0.0  | hypothetical protein                                                      |
| BMS0090 | 0.0.2  | conserved hypothetical protein                                            |
| BMS0091 | 0.0.0  | hypothetical protein                                                      |
| BMS0092 | 4.1.2  | putative glycosyl transferase                                             |

|         |       |                                                  |
|---------|-------|--------------------------------------------------|
| BMS0093 | 0.0.2 | conserved hypothetical protein                   |
| BMS0094 | 0.0.0 | hypothetical protein                             |
| BMS0095 | 1.1.1 | flagellar protein FlhS                           |
| BMS0096 | 1.1.1 | putative flagellar hook associated protein       |
| BMS0097 | 4.1.1 | putative integral membrane protein               |
| BMS0098 | 0.0.0 | hypothetical protein                             |
| BMS0100 | 7.0.0 | putative inositol monophosphatase family protein |
| BMS0101 | 6.5.0 | putative sigma-54 interacting protein            |

#### BMRD3.

|         |       |                                           |
|---------|-------|-------------------------------------------|
| BMS0170 | 4.1.4 | putative dTDP-4-dehydrorhamnose reductase |
| BMS0171 | 0.0.0 | hypothetical protein                      |
| BMS0172 | 4.1.5 | putative pilus-related subunit            |
| BMS0173 | 4.1.0 | putative exported protein                 |
| BMS0174 | 4.1.1 | putative membrane protein                 |
| BMS0175 | 4.1.0 | putative exported protein                 |
| BMS0176 | 4.1.1 | putative membrane protein                 |
| BMS0177 | 4.1.1 | putative membrane protein                 |
| BMS0178 | 4.1.5 | putative pilus assembly-related protein   |
| BMS0179 | 4.1.5 | putative pilus assembly-related protein   |
| BMS0180 | 4.1.5 | putative pilus assembly-related protein   |
| BMS0181 | 4.1.5 | putative pilus assembly-related protein   |
| BMS0182 | 4.1.0 | putative exported protein                 |
| BMS0183 | 4.1.0 | putative exported protein                 |
| BMS0184 | 4.1.0 | putative exported protein                 |

#### BMRD4.

|         |       |                                |
|---------|-------|--------------------------------|
| BMS0257 | 4.1.1 | putative membrane protein      |
| BMS0258 | 0.0.0 | hypothetical protein           |
| BMS0259 | 1.3.1 | putative chaperonin            |
| BMS0260 | 0.0.0 | hypothetical protein           |
| BMS0261 | 2.2.3 | putative helicase/endonuclease |
| BMS0262 | 4.1.0 | putative exported protein      |
| BMS0263 | 4.1.0 | putative exported protein      |
| BMS0264 | 4.1.0 | putative exported protein      |
| BMS0265 | 4.1.0 | putative lipoprotein           |
| BMS0266 | 4.1.0 | putative exported protein      |
| BMS0267 | 4.1.1 | putative membrane protein      |
| BMS0269 | 1.6.3 | ferrous iron transport protein |
| BMS0270 | 4.1.1 | putative membrane protein      |
| BMS0271 | 4.1.1 | putative membrane protein      |
| BMS0272 | 4.1.1 | putative membrane protein      |

#### BMRD5.

|         |        |                                                                 |
|---------|--------|-----------------------------------------------------------------|
| BMS0313 | 6.1.1  | putative sensor protein kinase AtoS for response regulator AtoC |
| BMS0314 | 3.3.18 | putative 5'-nucleotidase                                        |

|         |       |                                                                   |
|---------|-------|-------------------------------------------------------------------|
| BMS0315 | 1.5.2 | putative transmembrane Na <sup>+</sup> /H <sup>+</sup> antiporter |
| BMS0316 | 7.0.0 | putative aldose epimerase                                         |
| BMS0317 | 4.1.1 | putative membrane protein                                         |
| BMS0318 | 4.1.1 | putative membrane protein                                         |
| BMS0319 | 4.1.0 | putative exported protein                                         |
| BMS0320 | 4.1.0 | putative exported protein                                         |
| BMS0321 | 0.0.0 | hypothetical protein                                              |
| BMS0322 | 4.1.0 | putative exported protein                                         |
| BMS0323 | 0.0.0 | hypothetical protein                                              |
| BMS0325 | 1.3.1 | putative chaperone protein DnaK (pseudogene)                      |
| BMS0326 | 0.0.0 | hypothetical protein                                              |
| BMS0327 | 7.0.0 | putative glycosyltransferase                                      |

#### BMRD6.

|         |       |                                                              |
|---------|-------|--------------------------------------------------------------|
| BMS0382 | 4.1.4 | CDP-glucose 4,6-dehydratase                                  |
| BMS0383 | 4.1.4 | paratose synthase                                            |
| BMS0384 | 4.1.1 | putative membrane protein                                    |
| BMS0385 | 4.1.4 | putative 4-amino- 4-deoxy-l-arabinose lipid A<br>transferase |
| BMS0386 | 4.1.1 | putative membrane protein                                    |
| BMS0387 | 4.1.1 | putative membrane protein                                    |
| BMS0388 | 4.1.1 | putative membrane protein                                    |
| BMS0389 | 7.0.0 | putative glycosyltransferase                                 |

#### BMRD7.

|         |       |                                                 |
|---------|-------|-------------------------------------------------|
| BMS0518 | 4.1.1 | putative integral membrane protein              |
| BMS0519 | 0.0.2 | conserved hypothetical protein                  |
| BMS0520 | 4.1.1 | putative iron-regulated membrane protein        |
| BMS0521 | 4.1.0 | putative exported protein                       |
| BMS0522 | 4.1.0 | putative exported protein                       |
| BMS0523 | 4.1.3 | putative TonB-dependent outer membrane receptor |
| BMS0524 | 0.0.0 | hypothetical protein                            |
| BMS0525 | 1.6.3 | putative siderophore biosynthesis protein IucD  |
| BMS0526 | 1.6.3 | putative siderophore biosynthesis protein IucC  |
| BMS0527 | 1.6.3 | putative siderophore biosynthesis protein IucB  |
| BMS0528 | 1.6.3 | putative siderophore biosynthesis protein       |
| BMS0529 | 1.5.5 | putative transport-related membrane protein     |
| BMS0530 | 4.1.0 | putative exported protein                       |
| BMS0532 | 4.1.1 | putative membrane protein                       |
| BMS0533 | 7.0.0 | putative deaminase                              |
| BMS0534 | 4.1.1 | putative membrane protein                       |
| BMS0535 | 4.1.1 | putative membrane protein                       |
| BMS0536 | 4.1.1 | putative membrane protein                       |

#### BMRD8.

|         |       |                           |
|---------|-------|---------------------------|
| BMS0631 | 4.1.0 | putative exported protein |
| BMS0632 | 0.0.0 | hypothetical protein      |

|         |       |                                                   |
|---------|-------|---------------------------------------------------|
| BMS0633 | 4.1.0 | putative exported protein                         |
| BMS0634 | 4.1.0 | putative exported protein                         |
| BMS0635 | 4.1.1 | putative membrane protein                         |
| BMS0636 | 0.0.0 | hypothetical protein                              |
| BMS0637 | 3.4.4 | putative acyl-protein synthetase                  |
| BMS0638 | 3.4.3 | putative phenylacetate-coenzyme A ligase          |
| BMS0639 | 3.4.3 | putative phenylacetate-coenzyme A ligase          |
| BMS0640 | 0.0.0 | hypothetical protein                              |
| BMS0641 | 0.0.2 | conserved hypothetical protein                    |
| BMS0642 | 6.5.0 | putative regulatory protein                       |
| BMS0643 | 1.5.5 | putative transmembrane Acr-type transport protein |
| BMS0644 | 4.1.0 | putative exported protein                         |

BMRD9.

|          |       |                                               |
|----------|-------|-----------------------------------------------|
| BMS0733  | 4.1.0 | putative exported protein                     |
| BMS0734  | 0.0.2 | conserved hypothetical protein                |
| BMS0735  | 4.1.0 | putative exported protein                     |
| BMS0736  | 4.1.0 | putative exported protein                     |
| BMS0737  | 4.1.0 | putative exported protein                     |
| BMS0738  | 1.6.1 | putative glutathione S transferase            |
| BMS0739  | 1.4.2 | putative drug/sodium antiporter               |
| BMS0740  | 2.1.4 | putative protease                             |
| BMS0741  | 1.6.3 | putative siderophore-interacting protein      |
| BMS0742  | 4.1.0 | putative exported protein                     |
| BMS0743  | 4.1.0 | putative exported protein                     |
| BMS0744  | 4.1.0 | putative exported protein                     |
| BMS0745  | 4.1.1 | putative membrane protein                     |
| BMS0746  | 4.1.0 | putative exported protein                     |
| BMS0747  | 4.1.1 | putative membrane protein                     |
| BMS0749  | 0.0.2 | conserved hypothetical protein                |
| BMS0750  | 5.1.2 | putative integrase/recombinase                |
| BMS0751  | 5.1.2 | putative phage-related integrase (pseudogene) |
| BMS0752  | 0.0.0 | hypothetical protein                          |
| BMS0753  | 4.1.1 | putative membrane protein                     |
| BMS0754  | 0.0.0 | hypothetical protein                          |
| BMS0755  | 0.0.0 | hypothetical protein                          |
| BMS0755A | 0.0.0 | hypothetical protein                          |
| BMS0756  | 0.0.0 | hypothetical protein                          |
| BMS0757  | 4.1.1 | putative membrane protein                     |
| BMS0758  | 4.1.1 | putative membrane protein                     |
| BMS0759  | 5.1.2 | putative prophage-related protein             |
| BMS0760  | 5.1.2 | DNA-invertase                                 |
| BMS0761  | 0.0.0 | hypothetical protein                          |
| BMS0762  | 0.0.0 | hypothetical protein                          |
| BMS0763  | 0.0.0 | hypothetical protein                          |
| BMS0764  | 0.0.0 | hypothetical protein                          |
| BMS0765  | 0.0.0 | hypothetical protein                          |
| BMS0766  | 0.0.0 | hypothetical protein                          |
| BMS0767  | 0.0.0 | hypothetical protein                          |

|         |       |                                                         |
|---------|-------|---------------------------------------------------------|
| BMS0768 | 0.0.0 | hypothetical protein                                    |
| BMS0770 | 0.0.2 | conserved hypothetical protein                          |
| BMS0771 | 5.1.2 | putative integrase                                      |
| BMS0772 | 0.0.0 | hypothetical protein                                    |
| BMS0773 | 0.0.0 | hypothetical protein                                    |
| BMS0774 | 5.1.2 | phage-related conserved hypothetical protein            |
| BMS0775 | 0.0.0 | hypothetical protein                                    |
| BMS0776 | 0.0.2 | conserved hypothetical protein                          |
| BMS0777 | 5.1.2 | reverse transcriptase                                   |
| BMS0779 | 0.0.2 | conserved hypothetical protein                          |
| BMS0780 | 0.0.0 | hypothetical protein                                    |
| BMS0781 | 0.0.0 | hypothetical protein                                    |
| BMS0782 | 0.0.0 | hypothetical protein                                    |
| BMS0783 | 4.1.1 | putative membrane protein                               |
| BMS0786 | 0.0.0 | hypothetical protein                                    |
| BMS0787 | 0.0.2 | conserved hypothetical protein                          |
| BMS0788 | 4.1.1 | putative membrane protein                               |
| BMS0789 | 5.1.2 | putative phage protein                                  |
| BMS0790 | 2.2.3 | putative type I restriction enzyme modification protein |
| BMS0791 | 2.1.3 | putative type I restriction enzyme specificity protein  |
| BMS0792 | 2.1.3 | putative type I restriction enzyme                      |
| BMS0793 | 0.0.2 | conserved hypothetical protein                          |
| BMS0794 | 4.1.1 | putative membrane protein                               |
| BMS0795 | 0.0.2 | conserved hypothetical protein                          |
| BMS0797 | 0.0.0 | hypothetical protein                                    |
| BMS0798 | 0.0.0 | hypothetical protein                                    |
| BMS0799 | 0.0.0 | hypothetical protein                                    |
| BMS0801 | 0.0.0 | hypothetical protein                                    |
| BMS0802 | 0.0.0 | hypothetical protein                                    |
| BMS0803 | 0.0.0 | hypothetical protein                                    |
| BMS0805 | 1.4.2 | putative antibiotic modification-related protein        |
| BMS0806 | 0.0.2 | conserved hypothetical protein                          |
| BMS0807 | 0.0.0 | hypothetical protein                                    |
| BMS0808 | 0.0.0 | hypothetical protein                                    |
| BMS0809 | 6.3.6 | putative LysR-family regulatory protein                 |
| BMS0810 | 7.0.0 | putative acetyltransferase (GNAT) family protein        |
| BMS0811 | 4.1.0 | putative exported protein                               |
| BMS0812 | 0.0.2 | conserved hypothetical protein                          |
| BMS0813 | 4.1.0 | putative exported protein                               |
| BMS0814 | 0.0.0 | hypothetical protein                                    |

BMRD10.

|         |        |                                 |
|---------|--------|---------------------------------|
| BMS0855 | 0.0.2  | conserved hypothetical protein  |
| BMS0856 | 3.3.14 | spermidine synthase             |
| BMS0857 | 1.4.2  | putative glutathione peroxidase |
| BMS0858 | 6.4.0  | putative protein kinase         |
| BMS0859 | 4.1.1  | putative membrane protein       |
| BMS0860 | 7.0.0  | putative hydrolase              |
| BMS0861 | 0.0.2  | conserved hypothetical protein  |

|         |       |                                                     |
|---------|-------|-----------------------------------------------------|
| BMS0862 | 4.1.1 | putative membrane protein                           |
| BMS0863 | 0.0.2 | conserved hypothetical protein                      |
| BMS0864 | 6.3.8 | putative TetR family reulatory protein              |
| BMS0866 | 3.2.6 | putative cytochrome c biogenesis-related protein    |
| BMS0867 | 4.1.0 | putative exported protein                           |
| BMS0868 | 0.0.0 | hypothetical protein                                |
| BMS0869 | 4.1.0 | putative exported protein                           |
| BMS0870 | 4.1.1 | putative membrane protein                           |
| BMS0871 | 0.0.2 | putative conserved hypothetical protein             |
| BMS0873 | 4.1.0 | putative exported protein                           |
| BMS0874 | 7.0.0 | putative oxygenase                                  |
| BMS0875 | 0.0.0 | hypothetical protein                                |
| BMS0876 | 0.0.0 | hypothetical protein                                |
| BMS0877 | 0.0.0 | hypothetical protein                                |
| BMS0878 | 4.1.1 | putative membrane protein                           |
| BMS0879 | 4.1.0 | putative ankyrin repeat-containing exported protein |

#### BMRD11.

|         |       |                                           |
|---------|-------|-------------------------------------------|
| BMS1029 | 2.1.5 | putative serine metalloprotease precursor |
| BMS1030 | 0.0.2 | conserved hypothetical protein            |
| BMS1031 | 4.1.0 | putative exported protein                 |
| BMS1032 | 4.1.1 | putative membrane protein                 |
| BMS1033 | 4.2.2 | 50S ribosomal protein L28                 |
| BMS1034 | 0.0.0 | hypothetical protein                      |
| BMS1035 | 0.0.0 | hypothetical protein                      |
| BMS1036 | 4.1.1 | putative membrane protein                 |
| BMS1037 | 7.0.0 | putative lyase                            |
| BMS1038 | 0.0.0 | hypothetical protein                      |
| BMS1039 | 7.0.0 | putative aldo/keto reductase              |
| BMS1040 | 7.0.0 | putative glycosyl transferase             |
| BMS1041 | 4.1.0 | putative exported protein                 |
| BMS1042 | 3.4.2 | putative alanine dehydrogenase            |
| BMS1043 | 4.1.0 | putative exported protein                 |
| BMS1044 | 7.0.0 | putative histone deacetylase              |
| BMS1045 | 0.0.2 | conserved hypothetical protein            |
| BMS1046 | 4.1.0 | putative exported protein                 |
| BMS1047 | 4.1.0 | putative exported protein                 |
| BMS1048 | 0.0.0 | hypothetical protein                      |
| BMS1049 | 0.0.0 | hypothetical protein                      |
| BMS1050 | 0.0.0 | hypothetical protein                      |
| BMS1051 | 0.0.2 | conserved hypothetical protein            |
| BMS1052 | 0.0.0 | hypothetical protein                      |
| BMS1053 | 0.0.0 | hypothetical protein                      |
| BMS1054 | 4.1.1 | putative membrane protein                 |
| BMS1055 | 6.5.0 | putative transcriptional regulator        |
| BMS1056 | 2.1.4 | putative beta-amylase precursor           |
| BMS1057 | 7.0.0 | putative uridine kinase                   |
| BMS1058 | 0.0.0 | hypothetical protein                      |
| BMS1059 | 4.1.1 | putative membrane protein                 |

|         |       |                                                          |
|---------|-------|----------------------------------------------------------|
| BMS1060 | 4.1.0 | putative exported protein                                |
| BMS1061 | 4.1.1 | putative membrane protein                                |
| BMS1062 | 0.0.2 | conserved hypothetical protein                           |
| BMS1063 | 4.1.0 | putative exported protein                                |
| BMS1064 | 4.1.0 | putative exported protein                                |
| BMS1065 | 4.1.0 | putative exported protein                                |
| BMS1067 | 4.1.1 | putative membrane protein                                |
| BMS1068 | 6.3.6 | putative LysR-family regulatory protein                  |
| BMS1069 | 4.1.1 | putative integral membrane protein                       |
| BMS1070 | 1.5.2 | putative voltage gated chloride channel membrane protein |
| BMS1071 | 0.0.2 | conserved hypothetical protein                           |
| BMS1073 | 0.0.2 | conserved hypothetical protein                           |
| BMS1074 | 4.1.0 | putative exported protein                                |
| BMS1075 | 4.1.0 | putative exported protein                                |
| BMS1077 | 4.1.1 | putative membrane protein                                |
| BMS1078 | 1.5.5 | putative mechanosensitive ion channel protein            |

#### BMRD12.

|         |       |                                                   |
|---------|-------|---------------------------------------------------|
| BMS1245 | 4.1.1 | putative membrane protein                         |
| BMS1247 | 0.0.0 | hypothetical protein                              |
| BMS1248 | 4.1.1 | probable membrane protein                         |
| BMS1249 | 4.1.0 | putative exported protein                         |
| BMS1250 | 2.2.1 | arginyl-tRNA synthetase                           |
| BMS1251 | 4.1.0 | putative exported protein                         |
| BMS1252 | 7.0.0 | putative acetyltransferase                        |
| BMS1253 | 4.1.0 | putative exported protein                         |
| BMS1254 | 2.2.3 | putative DNA gyrase subunit B                     |
| BMS1255 | 2.2.3 | putative DNA gyrase subunit A                     |
| BMS1256 | 0.0.2 | conserved hypothetical protein                    |
| BMS1257 | 2.2.3 | integration host factor alpha-subunit (IHF-alpha) |
| BMS1258 | 6.5.0 | putative transcriptional regulatory protein       |
| BMS1259 | 3.2.8 | geranyltranstransferase                           |
| BMS1260 | 4.1.1 | putative membrane protein                         |
| BMS1261 | 4.1.1 | putative membrane protein                         |
| BMS1262 | 4.1.1 | putative membrane protein                         |
| BMS1263 | 4.1.0 | putative exported protein                         |
| BMS1264 | 4.1.0 | putative exported protein                         |
| BMS1265 | 4.1.0 | putative exported protein                         |
| BMS1266 | 4.1.1 | putative membrane protein                         |

#### BMRD13.

|                     |       |                                                         |
|---------------------|-------|---------------------------------------------------------|
| BMS1373<br>homolog) | 6.5.0 | NAD-dependent deacetylase (Regulatory protein SIR2)     |
| BMS1374             | 4.1.1 | putative membrane protein                               |
| BMS1375             | 0.0.2 | conserved hypothetical protein                          |
| BMS1376             | 1.2.1 | putative chromosomal replication initiator protein DnaA |
| BMS1377             | 0.0.0 | hypothetical protein                                    |

|         |       |                                    |
|---------|-------|------------------------------------|
| BMS1378 | 4.1.1 | putative membrane protein          |
| BMS1379 | 4.1.1 | putative membrane protein          |
| BMS1380 | 1.1.1 | putative motility membrane protein |
| BMS1381 | 4.1.1 | putative membrane protein          |
| BMS1382 | 1.1.1 | putative motility membrane protein |
| BMS1383 | 4.1.0 | putative exported protein          |
| BMS1384 | 4.1.0 | putative exported protein          |
| BMS1385 | 4.1.0 | putative exported protein          |
| BMS1386 | 0.0.0 | hypothetical protein               |
| BMS1387 | 0.0.0 | hypothetical protein               |
| BMS1388 | 0.0.0 | hypothetical protein               |
| BMS1389 | 4.1.1 | putative membrane protein          |
| BMS1390 | 1.5.2 | putative Na(+)/H(+) antiporter     |
| BMS1391 | 4.1.1 | putative membrane protein          |
| BMS1392 | 0.0.0 | hypothetical protein               |

#### BMRD14.

|         |       |                                                   |
|---------|-------|---------------------------------------------------|
| BMS1408 | 0.0.0 | hypothetical protein                              |
| BMS1409 | 4.1.1 | putative membrane protein                         |
| BMS1410 | 4.1.0 | putative exported protein                         |
| BMS1411 | 2.1.4 | putative serine metalloprotease precursor         |
| BMS1412 | 0.0.0 | hypothetical protein                              |
| BMS1413 | 0.0.0 | hypothetical protein                              |
| BMS1414 | 0.0.0 | hypothetical protein                              |
| BMS1415 | 1.5.5 | putative bacterial secretion system protein       |
| BMS1416 | 0.0.2 | conserved hypothetical protein                    |
| BMS1417 | 0.0.0 | hypothetical protein                              |
| BMS1418 | 4.1.1 | putative membrane protein                         |
| BMS1419 | 4.1.0 | putative exported protein                         |
| BMS1420 | 4.1.0 | putative exported protein                         |
| BMS1421 | 0.0.0 | hypothetical protein                              |
| BMS1422 | 0.0.2 | conserved hypothetical protein                    |
| BMS1423 | 4.1.1 | putative membrane protein                         |
| BMS1424 | 4.1.1 | putative membrane protein                         |
| BMS1425 | 4.1.0 | putative exported protein                         |
| BMS1426 | 0.0.2 | conserved hypothetical protein                    |
| BMS1427 | 1.5.2 | putative potassium efflux system                  |
| BMS1428 | 1.5.2 | putative transmembrane Acr-type transport protein |
| BMS1429 | 4.1.0 | putative exported protein                         |
| BMS1430 | 7.0.0 | putative isomerase                                |

#### BMRD15.

|         |       |                                                        |
|---------|-------|--------------------------------------------------------|
| BMS1436 | 0.0.0 | hypothetical protein                                   |
| BMS1437 | 0.0.0 | hypothetical protein                                   |
| BMS1438 | 7.0.0 | putative cholesterol dehydrogenase                     |
| BMS1439 | 3.6.1 | putative acyl-CoA ligase                               |
| BMS1440 | 7.0.0 | putative haloalkane dehalogenase                       |
| BMS1441 | 3.6.1 | putative 3-oxoacyl-[acyl-carrier-protein] synthase III |



protein

|         |       |                                                       |
|---------|-------|-------------------------------------------------------|
| BMS1442 | 7.0.0 | putative dehydrogenase                                |
| BMS1443 | 3.2.1 | putative acyl carrier protein                         |
| BMS1444 | 3.6.1 | putative 3-oxoacyl-[acyl-carrier-protein] synthase II |
| BMS1445 | 0.0.0 | hypothetical protein                                  |
| BMS1446 | 4.1.0 | putative exported protein                             |
| BMS1447 | 4.1.0 | putative exported protein                             |
| BMS1448 | 4.1.1 | putative membrane protein                             |
| BMS1449 | 6.1.1 | putative two-component sensor kinase (pseudogene)     |
| BMS1450 | 7.0.0 | putative betaine aldehyde dehydrogenase               |
| BMS1452 | 1.2.1 | putative chromosome partitioning protein              |
| BMS1453 | 0.0.2 | conserved hypothetical protein                        |
| BMS1454 | 4.1.0 | putative exported protein                             |
| BMS1455 | 0.0.2 | conserved hypothetical protein                        |
| BMS1456 | 4.1.1 | putative membrane protein                             |

BMRD16.

|         |       |                                                |
|---------|-------|------------------------------------------------|
| BMS1551 | 0.0.0 | hypothetical protein                           |
| BMS1552 | 7.0.0 | putative hydrolase                             |
| BMS1553 | 7.0.0 | putative desaturase                            |
| BMS1554 | 7.0.0 | putative desaturase                            |
| BMS1555 | 4.1.0 | putative exported protein                      |
| BMS1556 | 4.1.0 | putative exported protein                      |
| BMS1557 | 1.2.1 | putative chromosome partitioning protein       |
| BMS1558 | 0.0.0 | hypothetical protein                           |
| BMS1559 | 4.1.0 | putative exported protein                      |
| BMS1561 | 4.1.0 | putative exported protein                      |
| BMS1562 | 0.0.0 | hypothetical protein                           |
| BMS1563 | 4.1.1 | putative membrane protein                      |
| BMS1564 | 6.1.2 | putative reponse regulator                     |
| BMS1565 | 7.0.0 | putative bi-functional transferase/deacetylase |
| BMS1566 | 4.1.1 | putative membrane protein                      |
| BMS1567 | 4.1.1 | putative membrane protein                      |

BMRD17.

|         |       |                                                                               |
|---------|-------|-------------------------------------------------------------------------------|
| BMS1612 | 4.1.1 | putative membrane protein                                                     |
| BMS1613 | 6.1.3 | putative two-component system sensor kinase/response regulator fusion protein |
| BMS1614 | 4.1.0 | putative exported protein                                                     |
| BMS1615 | 4.1.0 | putative exported protein                                                     |
| BMS1616 | 4.1.1 | putative membrane protein                                                     |
| BMS1617 | 4.1.0 | putative exported protein                                                     |

BMRD18.

|         |       |                                             |
|---------|-------|---------------------------------------------|
| BMS1668 | 4.1.0 | putative exported protein                   |
| BMS1669 | 1.6.2 | putative choline transport membrane protein |
| BMS1670 | 2.2.1 | Lysyl-tRNA synthetase                       |

|         |       |                           |
|---------|-------|---------------------------|
| BMS1671 | 0.0.0 | hypothetical protein      |
| BMS1672 | 0.0.0 | hypothetical protein      |
| BMS1673 | 4.1.0 | putative exported protein |
| BMS1674 | 4.1.1 | putative membrane protein |

BMRD19.

|         |       |                                                 |
|---------|-------|-------------------------------------------------|
| BMS1866 | 2.2.1 | threonyl-tRNA synthetase                        |
| BMS1867 | 4.1.2 | D-alanine--D-alanine ligase                     |
| BMS1868 | 7.0.0 | putative aminotransferase                       |
| BMS1869 | 7.0.0 | putative acyltransferase                        |
| BMS1870 | 7.0.0 | putative aminotransferase                       |
| BMS1871 | 3.4.3 | acetate CoA-transferase alpha subunit 1         |
| BMS1872 | 3.4.3 | putative 3-oxoadipate CoA-transferase subunit B |
| BMS1873 | 0.0.0 | hypothetical protein                            |
| BMS1874 | 0.0.0 | hypothetical protein                            |
| BMS1875 | 0.0.0 | hypothetical protein                            |
| BMS1876 | 0.0.0 | hypothetical protein                            |
| BMS1877 | 0.0.0 | hypothetical protein                            |
| BMS1878 | 2.1.4 | putative exported peptidase                     |

BMRD20.

|         |       |                                |
|---------|-------|--------------------------------|
| BMS1941 | 4.1.0 | putative exported protein      |
| BMS1942 | 3.3.7 | inosine-guanosine kinase       |
| BMS1943 | 4.1.0 | putative exported protein      |
| BMS1944 | 4.1.0 | putative exported protein      |
| BMS1945 | 4.1.0 | putative exported protein      |
| BMS1946 | 7.0.0 | putative protease              |
| BMS1947 | 4.1.0 | putative exported protein      |
| BMS1948 | 0.0.0 | hypothetical protein           |
| BMS1949 | 0.0.0 | hypothetical protein           |
| BMS1950 | 0.0.2 | conserved hypothetical protein |
| BMS1951 | 1.5.2 | putative cation transporter    |
| BMS1952 | 0.0.0 | hypothetical protein           |
| BMS1953 | 4.1.1 | putative membrane protein      |
| BMS1954 | 0.0.0 | hypothetical protein           |
| BMS1955 | 0.0.0 | hypothetical protein           |
| BMS1956 | 0.0.0 | hypothetical protein           |
| BMS1957 | 0.0.0 | hypothetical protein           |
| BMS1958 | 0.0.0 | hypothetical protein           |

BMRD21.

|         |       |                                                      |
|---------|-------|------------------------------------------------------|
| BMS2076 | 1.5.5 | ABC transporter ATP-binding protein                  |
| BMS2077 | 0.0.0 | hypothetical protein                                 |
| BMS2079 | 3.3.8 | putative glycerophosphoryl diester phosphodiesterase |
| BMS2080 | 4.1.0 | putative exported protein                            |
| BMS2081 | 4.1.1 | putative transmembrane protein                       |
| BMS2082 | 0.0.2 | conserved hypothetical protein                       |

|         |        |                                                |
|---------|--------|------------------------------------------------|
| BMS2083 | 0.0.0  | hypothetical protein                           |
| BMS2084 | 0.0.0  | hypothetical protein                           |
| BMS2085 | 7.0.0  | putative acetyltransferase                     |
| BMS2086 | 2.2.10 | putative poly(A) polymerase                    |
| BMS2087 | 6.3.6  | putative LysR family transcriptional regulator |
| BMS2088 | 2.1.4  | putative protease                              |
| BMS2089 | 4.1.0  | putative exported protein                      |
| BMS2090 | 4.1.0  | putative exported protein                      |
| BMS2091 | 2.1.4  | putative exported endopeptidase protein        |

BMRD22.

|         |       |                                                               |
|---------|-------|---------------------------------------------------------------|
| BMS2093 | 0.0.0 | hypothetical protein                                          |
| BMS2094 | 1.5.5 | putative ABC transport system, exported protein               |
| BMS2096 | 4.1.0 | putative exported protein                                     |
| BMS2097 | 2.1.5 | putative serine metalloprotease precursor                     |
| BMS2098 | 1.5.1 | putative amino acid ABC transport system, periplasmic protein |
| BMS2099 | 0.0.0 | hypothetical protein                                          |
| BMS2100 | 0.0.2 | conserved hypothetical protein                                |
| BMS2101 | 4.1.1 | putative membrane protein                                     |
| BMS2102 | 2.1.4 | putative D-alanyl-D-alanine carboxypeptidase precursor        |
| BMS2103 | 4.1.0 | putative ankyrin repeat-containing exported protein           |
| BMS2104 | 4.1.0 | putative exported protein                                     |
| BMS2106 | 0.0.0 | hypothetical protein                                          |
| BMS2107 | 4.1.1 | putative membrane protein                                     |
| BMS2108 | 0.0.2 | conserved hypothetical protein                                |
| BMS2109 | 1.5.5 | putative transmembrane Acr-type transport protein             |
| BMS2110 | 4.1.0 | putative exported protein                                     |
| BMS2111 | 6.3.8 | putative TetR-family regulatory protein                       |
| BMS2112 | 0.0.2 | conserved hypothetical protein                                |
| BMS2114 | 4.1.0 | putative exported protein                                     |
| BMS2115 | 0.0.0 | hypothetical protein                                          |

BMRD23.

|         |       |                                                 |
|---------|-------|-------------------------------------------------|
| BMS2149 | 0.0.0 | hypothetical protein                            |
| BMS2150 | 0.0.2 | conserved hypothetical protein                  |
| BMS2151 | 0.0.0 | hypothetical protein                            |
| BMS2152 | 0.0.0 | hypothetical protein                            |
| BMS2153 | 4.1.5 | putative membrane-anchored cell surface protein |
| BMS2154 | 0.0.0 | hypothetical protein                            |

BMRD24.

|         |       |                                |
|---------|-------|--------------------------------|
| BMS2158 | 3.5.3 | putative cytochrome C          |
| BMS2159 | 4.1.0 | putative exported protein      |
| BMS2160 | 4.1.1 | putative membrane protein      |
| BMS2161 | 0.0.0 | hypothetical protein           |
| BMS2162 | 0.0.2 | conserved hypothetical protein |

|         |       |                                                    |
|---------|-------|----------------------------------------------------|
| BMS2163 | 2.1.4 | putative serine protease                           |
| BMS2164 | 4.1.0 | putative exported protein                          |
| BMS2165 | 0.0.2 | conserved hypothetical protein                     |
| BMS2166 | 6.1.1 | putative C4-dicarboxylate transport sensor protein |
| BMS2167 | 1.1.1 | putative flagellin subunit                         |
| BMS2168 | 0.0.0 | hypothetical protein                               |
| BMS2169 | 0.0.0 | hypothetical protein                               |

BMRD25.

|         |       |                                |
|---------|-------|--------------------------------|
| BMS2173 | 0.0.2 | conserved hypothetical protein |
| BMS2174 | 0.0.0 | hypothetical protein           |
| BMS2175 | 0.0.0 | hypothetical protein           |
| BMS2176 | 4.1.0 | putative exported protein      |
| BMS2177 | 0.0.2 | conserved hypothetical protein |
| BMS2178 | 0.0.2 | conserved hypothetical protein |
| BMS2179 | 4.1.0 | putative exported protein      |
| BMS2180 | 4.1.0 | putative lipoprotein           |
| BMS2181 | 4.1.0 | putative exported protein      |

BMRD26.

|         |        |                                                                 |
|---------|--------|-----------------------------------------------------------------|
| BMS2818 | 4.1.1  | putative membrane protein                                       |
| BMS2819 | 7.0.0  | putative NAD(P)H dehydrogenase                                  |
| BMS2820 | 6.3.8  | putative TetR-family regulatory protein                         |
| BMS2821 | 1.4.2  | putative microcin immunity protein                              |
| BMS2822 | 4.1.1  | putative membrane protein                                       |
| BMS2823 | 6.3.6  | putative LysR-family transcriptional regulator                  |
| BMS2824 | 3.3.15 | putative short-chain dehydrogenase/reductase                    |
| BMS2825 | 4.1.0  | putative exported protein                                       |
| BMS2826 | 6.1.2  | putative two-component system response regulator                |
| BMS2827 | 6.1.1  | putative two-component system sensor kinase                     |
| BMS2828 | 0.0.2  | conserved hypothetical protein                                  |
| BMS2829 | 0.0.2  | conserved hypothetical protein                                  |
| BMS2830 | 2.2.3  | putative DNA-3-methyladenine glycosylase I                      |
| BMS2831 | 3.5.2  | putative exported pseudoazurin                                  |
| BMS2832 | 1.4.2  | catalase-peroxidase                                             |
| BMS2833 | 7.0.0  | putative acyl-acyl carrier protein thioesterase                 |
| BMS2834 | 0.0.0  | hypothetical protein                                            |
| BMS2835 | 4.1.0  | putative exported protein                                       |
| BMS2836 | 4.1.0  | putative exported protein                                       |
| BMS2837 | 1.5.5  | putative transmembrane Acr-type transport protein               |
| BMS2838 | 4.1.0  | putative exported protein                                       |
| BMS2839 | 1.5.5  | putative outer membrane efflux protein                          |
| BMS2840 | 6.3.7  | putative MarR-family regulatory protein                         |
| BMS2841 | 4.1.0  | putative exported protein                                       |
| BMS2842 | 1.4.3  | putative bicyclomycin resistance protein (probable transporter) |
| BMS2843 | 0.0.2  | conserved hypothetical protein                                  |
| BMS2844 | 0.0.0  | hypothetical protein                                            |

|         |        |                                                    |
|---------|--------|----------------------------------------------------|
| BMS2845 | 4.1.2  | putative periplasmic protein                       |
| BMS2846 | 1.1.1  | putative chemotaxis protein                        |
| BMS2847 | 1.5.5  | putative C4-dicarboxylate transport sensor protein |
| BMS2849 | 0.0.2  | conserved hypothetical protein                     |
| BMS2850 | 6.1.1  | putative two-component system, sensor kinase       |
| BMS2851 | 4.1.1  | putative membrane protein                          |
| BMS2852 | 4.1.0  | putative exported protein                          |
| BMS2853 | 0.0.2  | putative glycoprotein                              |
| BMS2854 | 7.0.0  | putative regulatory protein                        |
| BMS2855 | 7.0.0  | putative dehydrogenase accessory protein           |
| BMS2856 | 3.3.11 | putative xanthine dehydrogenase large subunit      |
| BMS2857 | 3.3.11 | putative xanthine dehydrogenase                    |
| BMS2858 | 2.2.1  | putative tRNA pseudouridylate synthase             |
| BMS2859 | 4.1.0  | putative exported protein                          |
| BMS2860 | 4.1.0  | putative exported protein                          |
| BMS2861 | 4.1.0  | putative exported protein                          |
| BMS2862 | 4.1.1  | putative membrane protein                          |

BMRD27.

|         |       |                                                         |
|---------|-------|---------------------------------------------------------|
| BMS2995 | 4.1.0 | putative exported protein                               |
| BMS2996 | 4.1.0 | putative exported protein                               |
| BMS2997 | 0.0.2 | hypothetical protein                                    |
| BMS2998 | 6.2.1 | putative RNA polymerase sigma factor                    |
| BMS2999 | 0.0.0 | hypothetical protein                                    |
| BMS3000 | 0.0.0 | hypothetical protein                                    |
| BMS3001 | 1.5.1 | putative oligopeptide transport system permease protein |
| BMS3002 | 1.5.0 | putative ABC transporter, permease protein              |
| BMS3003 | 1.5.5 | putative ABC transport system solute-binding protein    |
| BMS3004 | 0.0.0 | hypothetical protein                                    |
| BMS3005 | 4.1.0 | putative exported protein                               |
| BMS3006 | 0.0.2 | conserved hypothetical protein                          |
| BMS3007 | 4.1.0 | putative exported protein                               |
| BMS3008 | 7.0.0 | putative ATP-binding protein                            |
| BMS3009 | 1.5.4 | putative ion-transporting ATPase                        |

BMRD28.

|         |        |                                                          |
|---------|--------|----------------------------------------------------------|
| BMS3094 | 0.0.0  | hypothetical protein                                     |
| BMS3095 | 0.0.0  | hypothetical protein                                     |
| BMS3096 | 7.0.0  | putative DNA binding protein                             |
| BMS3097 | 0.0.0  | hypothetical protein                                     |
| BMS3098 | 0.0.0  | hypothetical protein                                     |
| BMS3099 | 0.0.2  | putative homologue of hemolysin protein                  |
| BMS3100 | 3.3.18 | putative CMP-N-acetylneuraminic acid synthetase          |
| BMS3101 | 0.0.2  | conserved hypothetical protein                           |
| BMS3102 | 0.0.0  | hypothetical protein                                     |
| BMS3104 | 4.1.5  | putative pilin glycosylation protein                     |
| BMS3105 | 3.4.3  | putative sorbitol/galactitol-1-phosphate 5-dehydrogenase |

|         |       |                                                                 |
|---------|-------|-----------------------------------------------------------------|
| BMS3106 | 0.0.0 | hypothetical protein                                            |
| BMS3107 | 3.2.6 | putative heme/metallo cofactor biosynthesis related protein     |
| BMS3108 | 3.2.9 | putative cofactor modifying protein                             |
| BMS3109 | 7.0.0 | putative carbon-nitrogen hydrolase                              |
| BMS3110 | 4.1.0 | putative exported protein                                       |
| BMS3111 | 0.0.0 | hypothetical protein                                            |
| BMS3112 | 1.5.5 | putative transport-related membrane protein                     |
| BMS3113 | 4.1.1 | putative membrane protein                                       |
| BMS3114 | 4.1.1 | putative membrane protein                                       |
| BMS3115 | 0.0.0 | hypothetical protein                                            |
| BMS3116 | 4.1.0 | putative exported protein                                       |
| BMS3117 | 4.1.1 | putative membrane protein                                       |
| BMS3118 | 4.1.0 | putative exported protein                                       |
| BMS3119 | 0.0.0 | hypothetical protein                                            |
| BMS3120 | 4.1.1 | putative membrane protein                                       |
| BMS3121 | 0.0.2 | conserved hypothetical protein                                  |
| BMS3122 | 4.1.5 | putative pilin glycosylation protein                            |
| BMS3123 | 4.1.5 | putative aminotransferase                                       |
| BMS3124 | 7.0.0 | putative oxidoreductase                                         |
| BMS3125 | 7.0.0 | putative glycosyl transferase                                   |
| BMS3126 | 3.2.9 | putative molybdenum cofactor biosynthesis protein               |
| BMS3127 | 4.1.1 | putative membrane protein                                       |
| BMS3128 | 4.1.1 | putative membrane protein                                       |
| BMS3129 | 4.1.1 | putative membrane protein                                       |
| BMS3130 | 0.0.0 | hypothetical protein                                            |
| BMS3131 | 0.0.0 | hypothetical protein                                            |
| BMS3132 | 0.0.0 | hypothetical protein                                            |
| BMS3133 | 4.1.1 | putative membrane protein                                       |
| BMS3134 | 3.2.9 | putative molybdopterin cofactor synthesis protein               |
| BMS3135 | 0.0.2 | conserved hypothetical protein                                  |
| BMS3136 | 4.1.4 | putative UDP-glucose-4-epimerase                                |
| BMS3137 | 4.1.0 | putative exported protein                                       |
| BMS3138 | 7.0.0 | putative glycosyl transferase                                   |
| BMS3139 | 0.0.0 | hypothetical protein                                            |
| BMS3140 | 0.0.0 | hypothetical protein                                            |
| BMS3141 | 1.5.5 | putative O-antigen export ABC transporter, ATP-binding protein  |
| BMS3142 | 1.5.5 | putative polysaccharide export ABC transporter permease protein |
| BMS3143 | 0.0.0 | hypothetical protein                                            |
| BMS3144 | 0.0.0 | hypothetical protein                                            |
| BMS3145 | 0.0.2 | conserved hypothetical protein                                  |
| BMS3146 | 7.0.0 | putative glycosyl transferase                                   |
| BMS3147 | 7.0.0 | putative transferase                                            |
| BMS3148 | 0.0.0 | hypothetical protein                                            |
| BMS3149 | 0.0.2 | conserved hypothetical protein                                  |
| BMS3150 | 3.3.9 | transketolase C-terminal subunit                                |

BMRD29.

|         |       |                                              |
|---------|-------|----------------------------------------------|
| BMS3325 | 4.1.0 | putative exported protein                    |
| BMS3326 | 4.1.0 | putative exported protein                    |
| BMS3327 | 4.1.1 | putative membrane protein                    |
| BMS3328 | 4.1.0 | putative exported protein                    |
| BMS3329 | 4.1.0 | putative lipoprotein                         |
| BMS3330 | 1.1.1 | putative methyl-accepting chemotaxis protein |
| BMS3331 | 4.1.1 | putative membrane protein                    |
| BMS3332 | 2.1.4 | putative exported aminopeptidase             |
| BMS3333 | 4.1.1 | putative membrane protein                    |
| BMS3334 | 4.1.1 | putative membrane protein                    |
| BMS3335 | 4.1.0 | conserved hypothetical exported protein      |
